# Supplementary material for: How universal are universal preschool health checks? An observational study using routine data from New Zealand’s B4 School Check
Source: PubMed Central journal article supplement — BMJ Open. 2019 Apr 3;9(4):e025535. doi: 10.1136/bmjopen-2018-025535 (PMC6500230; doi:10.1136/bmjopen-2018-025535), 2019-04-03
Supplement: bmjopen-2018-025535supp001.pdf [file bmjopen-2018-025535supp001.pdf]

## **Appendix 1**

### **Sensitivity analysis**

The table below shows the effects of:

1. Changing the criteria for inclusion in the population (column 1). In the main analyses, children were included in the population if they were in the IDI spine AND had health or birth records.

Column 1 of the table below shows the results when the population was defined as children who were in the IDI spine OR had birth or health records.

2. Changing the overseas time cut-off for exclusion from the residential mobility and hospitalisation analyses (column 2, differences only apply to hospitalisation and meshblock change variables). In the main analyses, children were excluded if they had spent more than a year overseas. Column 2 of the table below shows the results if all children were included regardless of the amount of time spent overseas.

|                                            | Different population |                     |                         |                        | Different overseas cut-off |                     |                         |                        |
|--------------------------------------------|----------------------|---------------------|-------------------------|------------------------|----------------------------|---------------------|-------------------------|------------------------|
|                                            | OR (95% CI)          |                     |                         |                        | OR (95% CI)                |                     |                         |                        |
|                                            | N                    | VHT incomplete      | Nurse checks incomplete | SDQ Teacher incomplete | N                          | VHT incomplete      | Nurse checks incomplete | SDQ Teacher incomplete |
| <b>Sex</b>                                 |                      |                     |                         |                        |                            |                     |                         |                        |
| Male                                       | 136896               | 0.98<br>(1.01,0.96) | 0.98<br>(1.00,0.96)     | 0.99<br>(1.01,0.98)    | 129834                     | 0.98<br>(1.01,0.96) | 0.98<br>(1.00,0.96)     | 1.00<br>(1.01,0.98)    |
| Female                                     | 128967               | -                   | -                       | -                      | 122439                     | -                   | -                       | -                      |
| <b>Ethnicity</b>                           |                      |                     |                         |                        |                            |                     |                         |                        |
| Māori                                      | 73092                | 0.76<br>(0.79,0.75) | 0.74<br>(0.75,0.72)     | 0.81<br>(0.82,0.79)    | 71196                      | 0.60<br>(0.61,0.58) | 0.63<br>(0.64,0.61)     | 0.76<br>(0.78,0.75)    |
| Pacific                                    | 39903                | 0.60<br>(0.62,0.59) | 0.68<br>(0.69,0.66)     | 0.38<br>(0.39,0.37)    | 37857                      | 0.58<br>(0.60,0.56) | 0.67<br>(0.69,0.65)     | 0.37<br>(0.38,0.36)    |
| Asian                                      | 33039                | 1.09<br>(1.12,1.04) | 1.20<br>(1.23,1.16)     | 0.76<br>(0.78,0.75)    | 30825                      | 1.30<br>(1.35,1.25) | 1.39<br>(1.45,1.35)     | 0.78<br>(0.80,0.76)    |
| European                                   | 180345               | 1.72<br>(1.75,1.69) | 1.49<br>(1.52,1.47)     | 2.13<br>(2.17,2.13)    | 173232                     | 1.67<br>(1.72,1.64) | 1.41<br>(1.45,1.39)     | 2.13<br>(2.17,2.08)    |
|                                            | 136896               | 0.98<br>(1.01,0.96) | 0.98<br>(1.00,0.96)     | 0.99<br>(1.01,0.98)    | 129834                     | 0.98<br>(1.01,0.96) | 0.98<br>(1.00,0.96)     | 1.00<br>(1.01,0.98)    |
| <b>Number of siblings at time of birth</b> |                      |                     |                         |                        |                            |                     |                         |                        |
| 0                                          | 123123               | -                   | -                       | -                      | 123126                     | -                   | -                       | -                      |
| 1                                          | 70626                | 1.18<br>(1.22,1.15) | 1.05<br>(1.09,1.03)     | 1.09<br>(1.11,1.06)    | 70629                      | 1.18<br>(1.22,1.15) | 1.05<br>(1.09,1.03)     | 1.09<br>(1.11,1.06)    |
| 2+                                         | 43527                | 0.71<br>(0.74,0.69) | 0.68<br>(0.70,0.66)     | 0.78<br>(0.80,0.77)    | 43527                      | 0.71<br>(0.74,0.69) | 0.68<br>(0.70,0.66)     | 0.78<br>(0.80,0.77)    |
| <b>Socioeconomic deprivation</b>           |                      |                     |                         |                        |                            |                     |                         |                        |
| NZDep quintile                             |                      |                     |                         |                        |                            |                     |                         |                        |
| 1 (least deprived)                         | 52995                | -                   | -                       | -                      | 50517                      |                     |                         |                        |
| 2                                          | 48081                | 0.89<br>(0.93,0.86) | 0.92<br>(0.95,0.88)     | 0.89<br>(0.92,0.87)    | 46326                      | 0.85<br>(0.89,0.81) | 0.89<br>(0.93,0.86)     | 0.88<br>(0.91,0.86)    |

|                   |       |                     |                     |                     |       |                     |                     |                     |
|-------------------|-------|---------------------|---------------------|---------------------|-------|---------------------|---------------------|---------------------|
| 3                 | 47283 | 0.82<br>(0.85,0.79) | 0.85<br>(0.88,0.82) | 0.89<br>(0.92,0.88) | 45672 | 0.77<br>(0.80,0.74) | 0.82<br>(0.85,0.79) | 0.88<br>(0.91,0.86) |
| 4                 | 48720 | 0.72<br>(0.75,0.69) | 0.79<br>(0.82,0.77) | 0.81<br>(0.83,0.79) | 47043 | 0.66<br>(0.69,0.64) | 0.77<br>(0.79,0.74) | 0.79<br>(0.81,0.78) |
| 5 (most deprived) | 64308 | 0.54<br>(0.56,0.53) | 0.64<br>(0.66,0.62) | 0.53<br>(0.54,0.52) | 61854 | 0.50<br>(0.52,0.48) | 0.62<br>(0.64,0.60) | 0.52<br>(0.53,0.51) |

Mother highest qualification

|                          |       |                     |                     |                     |       |                     |                     |                     |
|--------------------------|-------|---------------------|---------------------|---------------------|-------|---------------------|---------------------|---------------------|
| No formal qualifications | 27672 | 0.48<br>(0.51,0.46) | 0.61<br>(0.63,0.58) | 0.68<br>(0.70,0.66) | 27675 | 0.48<br>(0.51,0.46) | 0.61<br>(0.63,0.58) | 0.68<br>(0.70,0.66) |
| Secondary school         | 67047 | 0.72<br>(0.75,0.69) | 0.82<br>(0.85,0.79) | 0.83<br>(0.85,0.81) | 67047 | 0.72<br>(0.75,0.69) | 0.82<br>(0.85,0.79) | 0.83<br>(0.85,0.81) |
| Bachelors degree         | 41901 | 0.81<br>(0.85,0.78) | 0.84<br>(0.87,0.81) | 0.86<br>(0.88,0.84) | 41901 | 0.81<br>(0.85,0.78) | 0.84<br>(0.87,0.81) | 0.86<br>(0.88,0.84) |
| Postgraduate degree      | 57570 | -                   | -                   | -                   | 57570 | -                   | -                   | -                   |

Father highest qualification

|                         |       |                     |                     |                     |       |                     |                     |                     |
|-------------------------|-------|---------------------|---------------------|---------------------|-------|---------------------|---------------------|---------------------|
| No formal qualification | 26712 | 0.65<br>(0.68,0.61) | 0.73<br>(0.76,0.70) | 0.82<br>(0.85,0.79) | 26712 | 0.65<br>(0.68,0.61) | 0.73<br>(0.76,0.70) | 0.82<br>(0.85,0.79) |
| Secondary school        | 51177 | 0.86<br>(0.91,0.82) | 0.91<br>(0.94,0.88) | 0.90<br>(0.93,0.88) | 51177 | 0.86<br>(0.91,0.82) | 0.91<br>(0.94,0.88) | 0.90<br>(0.93,0.88) |
| Bachelors degree        | 47388 | 0.99<br>(1.04,0.94) | 0.98<br>(1.02,0.94) | 1.06<br>(1.10,1.04) | 47388 | 0.99<br>(1.04,0.94) | 0.98<br>(1.02,0.94) | 1.06<br>(1.10,1.04) |
| Postgraduate degree     | 39450 | -                   | -                   | -                   | 39450 | -                   | -                   | -                   |

Member of household receives benefit income

|     |        |                     |                     |                     |        |                     |                     |                     |
|-----|--------|---------------------|---------------------|---------------------|--------|---------------------|---------------------|---------------------|
| No  | 159069 | -                   | -                   | -                   | 158679 | -                   | -                   | -                   |
| Yes | 51777  | 0.57<br>(0.59,0.55) | 0.65<br>(0.66,0.63) | 0.66<br>(0.67,0.65) | 51720  | 0.56<br>(0.58,0.55) | 0.64<br>(0.66,0.63) | 0.66<br>(0.67,0.65) |

Family circumstances

Age of mother at child's birth

|       |       |                     |                     |                     |       |                     |                     |                     |
|-------|-------|---------------------|---------------------|---------------------|-------|---------------------|---------------------|---------------------|
| <20   | 14313 | 0.48<br>(0.51,0.46) | 0.56<br>(0.59,0.54) | 0.64<br>(0.66,0.62) | 14313 | 0.48<br>(0.51,0.46) | 0.56<br>(0.59,0.54) | 0.64<br>(0.66,0.62) |
| 20-24 | 41889 | 0.63<br>(0.66,0.61) | 0.69<br>(0.72,0.67) | 0.75<br>(0.77,0.74) | 41889 | 0.63<br>(0.66,0.61) | 0.69<br>(0.72,0.67) | 0.75<br>(0.77,0.74) |
| 25-29 | 55800 | 0.83<br>(0.86,0.79) | 0.88<br>(0.90,0.85) | 0.88<br>(0.91,0.87) | 55800 | 0.83<br>(0.86,0.79) | 0.88<br>(0.90,0.85) | 0.88<br>(0.91,0.87) |
| 30-34 | 66297 | -                   | -                   | -                   | 66297 | -                   | -                   | -                   |
| 35+   | 58977 | 0.90<br>(0.93,0.87) | 0.89<br>(0.92,0.86) | 0.95<br>(0.97,0.93) | 58974 | 0.90<br>(0.93,0.87) | 0.89<br>(0.92,0.86) | 0.95<br>(0.97,0.93) |

Father on birth certificate

|     |        |                     |                     |                     |        |                     |                     |                     |
|-----|--------|---------------------|---------------------|---------------------|--------|---------------------|---------------------|---------------------|
| No  | 12612  | 0.56<br>(0.59,0.53) | 0.61<br>(0.64,0.59) | 0.60<br>(0.62,0.57) | 12612  | 0.56<br>(0.59,0.53) | 0.61<br>(0.64,0.59) | 0.60<br>(0.62,0.57) |
| Yes | 224664 | -                   | -                   | -                   | 224664 | -                   | -                   | -                   |

Mother speaks English

|     |        |                     |                     |                     |        |                     |                     |                     |
|-----|--------|---------------------|---------------------|---------------------|--------|---------------------|---------------------|---------------------|
| No  | 3483   | 0.81<br>(0.90,0.72) | 1.00<br>(1.10,0.92) | 0.56<br>(0.60,0.53) | 3483   | 0.81<br>(0.90,0.72) | 1.00<br>(1.10,0.92) | 0.56<br>(0.60,0.53) |
| Yes | 196248 | -                   | -                   | -                   | 196248 | -                   | -                   | -                   |

**Housing**

|       |        |                     |                     |                     |        |                     |                     |                     |
|-------|--------|---------------------|---------------------|---------------------|--------|---------------------|---------------------|---------------------|
| Urban | 224976 | -                   | -                   | -                   | 215775 | -                   | -                   | -                   |
| Rural | 36630  | 1.05<br>(1.09,1.01) | 1.03<br>(1.06,1.00) | 1.59<br>(1.61,1.54) | 35838  | 0.93<br>(0.96,0.89) | 0.95<br>(0.98,0.93) | 1.54<br>(1.59,1.52) |

Household size

|            |        |                     |                     |                     |        |                     |                     |                     |
|------------|--------|---------------------|---------------------|---------------------|--------|---------------------|---------------------|---------------------|
| 2-4 people | 121098 | -                   | -                   | -                   | 120852 | -                   | -                   | -                   |
| 5-7 people | 77961  | 0.74<br>(0.76,0.71) | 0.75<br>(0.76,0.72) | 0.76<br>(0.77,0.75) | 77808  | 0.74<br>(0.76,0.71) | 0.74<br>(0.76,0.72) | 0.76<br>(0.77,0.75) |
| 8+ people  | 11784  | 0.42<br>(0.44,0.40) | 0.51<br>(0.53,0.49) | 0.36<br>(0.37,0.34) | 11742  | 0.42<br>(0.44,0.40) | 0.51<br>(0.53,0.49) | 0.36<br>(0.37,0.34) |

|             |        |                     |                     |                     |        |                     |                     |                     |
|-------------|--------|---------------------|---------------------|---------------------|--------|---------------------|---------------------|---------------------|
| Own home    | 112581 | -                   | -                   | -                   | 112458 | -                   | -                   | -                   |
| Rented home | 94146  | 0.56<br>(0.57,0.54) | 0.63<br>(0.65,0.62) | 0.71<br>(0.72,0.69) | 93840  | 0.56<br>(0.58,0.54) | 0.64<br>(0.65,0.63) | 0.71<br>(0.72,0.70) |

Number of residence changes age 0-4

|      |       |                     |                     |                     |       |                     |                     |                     |
|------|-------|---------------------|---------------------|---------------------|-------|---------------------|---------------------|---------------------|
| None | 61761 | -                   | -                   | -                   | 62412 | -                   | -                   | -                   |
| 1    | 57459 | 2.86<br>(2.94,2.78) | 2.13<br>(2.17,2.08) | 1.33<br>(1.37,1.30) | 47994 | 1.16<br>(1.22,1.12) | 1.01<br>(1.04,0.98) | 0.90<br>(0.92,0.88) |
| 2    | 42891 | 2.86<br>(2.94,2.70) | 2.00<br>(2.08,1.92) | 1.25<br>(1.28,1.22) | 31935 | 0.96<br>(1.00,0.92) | 0.85<br>(0.88,0.81) | 0.83<br>(0.85,0.81) |
| 3    | 28653 | 2.33<br>(2.44,2.22) | 1.67<br>(1.72,1.61) | 1.15<br>(1.18,1.11) | 20745 | 0.85<br>(0.90,0.81) | 0.73<br>(0.76,0.70) | 0.78<br>(0.81,0.76) |
| 4    | 18810 | 2.04<br>(2.13,1.92) | 1.41<br>(1.47,1.37) | 1.08<br>(1.11,1.04) | 32235 | 0.66<br>(0.68,0.63) | 0.60<br>(0.62,0.58) | 0.76<br>(0.79,0.75) |
| 5+   | 30447 | 1.56<br>(1.61,1.49) | 1.16<br>(1.20,1.12) | 1.05<br>(1.09,1.03) | 62412 | 1.37<br>(1.43,1.32) | 1.18<br>(1.22,1.14) | 0.99<br>(1.01,0.97) |

Health status

Mother smoking status

|                |        |                     |                     |                     |        |                     |                     |                     |
|----------------|--------|---------------------|---------------------|---------------------|--------|---------------------|---------------------|---------------------|
| Regular smoker | 38457  | 0.56<br>(0.57,0.53) | 0.63<br>(0.65,0.61) | 0.78<br>(0.79,0.76) | 38460  | 0.56<br>(0.57,0.53) | 0.63<br>(0.65,0.61) | 0.78<br>(0.79,0.76) |
| Ex smoker      | 45420  | 0.94<br>(0.98,0.90) | 0.90<br>(0.93,0.88) | 1.08<br>(1.10,1.05) | 45420  | 0.94<br>(0.98,0.90) | 0.90<br>(0.93,0.88) | 1.08<br>(1.10,1.05) |
| Never smoked   | 111219 | -                   | -                   | -                   | 111219 | -                   | -                   | -                   |

Birthweight

|            |        |                     |                     |                     |        |                     |                     |                     |
|------------|--------|---------------------|---------------------|---------------------|--------|---------------------|---------------------|---------------------|
| <2500g     | 14049  | 0.57<br>(0.60,0.55) | 0.73<br>(0.76,0.70) | 0.87<br>(0.90,0.84) | 14049  | 0.57<br>(0.60,0.55) | 0.73<br>(0.76,0.70) | 0.87<br>(0.90,0.84) |
| 2500-4000g | 187242 | -                   | -                   | -                   | 187239 | -                   | -                   | -                   |
| >4000g     | 34746  | 1.01<br>(1.05,0.97) | 0.96<br>(0.99,0.93) | 1.04<br>(1.06,1.01) | 34749  | 1.01<br>(1.05,0.97) | 0.96<br>(0.99,0.93) | 1.04<br>(1.06,1.01) |

Gestation

|             |        |                     |                     |                     |        |                     |                     |                     |
|-------------|--------|---------------------|---------------------|---------------------|--------|---------------------|---------------------|---------------------|
| <37 weeks   | 17922  | 0.60<br>(0.63,0.57) | 0.76<br>(0.79,0.73) | 0.88<br>(0.91,0.85) | 17922  | 0.60<br>(0.63,0.57) | 0.76<br>(0.79,0.73) | 0.88<br>(0.91,0.85) |
| 37-42 weeks | 217128 | -                   | -                   | -                   | 217128 | -                   | -                   | -                   |
| >42 weeks   | 1443   | 1.00<br>(1.19,0.85) | 0.97<br>(1.11,0.84) | 0.67<br>(0.75,0.61) | 1443   | 1.00<br>(1.19,0.85) | 0.97<br>(1.11,0.84) | 0.67<br>(0.75,0.61) |

Child referred for disability support assessment

|     |        |                     |                     |                     |        |                     |                     |                     |
|-----|--------|---------------------|---------------------|---------------------|--------|---------------------|---------------------|---------------------|
| No  | 261408 | -                   | -                   | -                   | 247875 | -                   | -                   | -                   |
| Yes | 4473   | 0.46<br>(0.50,0.43) | 0.46<br>(0.49,0.43) | 0.61<br>(0.65,0.57) | 4401   | 0.34<br>(0.37,0.32) | 0.38<br>(0.40,0.36) | 0.56<br>(0.60,0.53) |

Number of quarters enrolled with GP age 0-4

|      |       |                     |                     |                     |       |                     |                     |                     |
|------|-------|---------------------|---------------------|---------------------|-------|---------------------|---------------------|---------------------|
| 0-3  | 25407 | 0.16<br>(0.17,0.16) | 0.23<br>(0.24,0.22) | 0.41<br>(0.42,0.39) | 16215 | 0.16<br>(0.17,0.16) | 0.20<br>(0.21,0.19) | 0.42<br>(0.44,0.41) |
| 4-7  | 41286 | 0.74<br>(0.77,0.72) | 0.81<br>(0.83,0.78) | 0.91<br>(0.93,0.89) | 42645 | 0.53<br>(0.55,0.51) | 0.54<br>(0.55,0.52) | 0.83<br>(0.85,0.81) |
| 8-11 | 90621 | 0.95<br>(0.98,0.92) | 0.97<br>(1.00,0.94) | 0.99<br>(1.01,0.97) | 95298 | 0.76<br>(0.79,0.74) | 0.78<br>(0.80,0.76) | 0.98<br>(1.00,1.00) |
| 12+  | 93174 | -                   | -                   | -                   | -     | -                   | -                   | -                   |

Number of hospital admissions age 0-4

|        |        |                     |                     |                     |        |                     |                     |                     |
|--------|--------|---------------------|---------------------|---------------------|--------|---------------------|---------------------|---------------------|
| None   | 104382 | -                   | -                   | -                   | 108081 | -                   | -                   | -                   |
| 1 to 2 | 104280 | 2.17<br>(2.22,2.13) | 1.75<br>(1.82,1.72) | 1.35<br>(1.37,1.32) | 111288 | 1.32<br>(1.35,1.28) | 1.23<br>(1.27,1.20) | 1.14<br>(1.16,1.12) |
| 3 to 5 | 21528  | 1.85<br>(1.92,1.79) | 1.64<br>(1.72,1.59) | 1.32<br>(1.35,1.27) | 22668  | 1.06<br>(1.11,1.01) | 1.11<br>(1.15,1.06) | 1.09<br>(1.11,1.05) |
| 6+     | 9834   | 1.23<br>(1.32,1.18) | 1.19<br>(1.25,1.14) | 1.12<br>(1.16,1.08) | 10242  | 0.73<br>(0.77,0.69) | 0.82<br>(0.86,0.78) | 0.94<br>(0.98,0.91) |

Total days in hospital age 0-4

|          |        |                     |                     |                     |        |                     |                     |                     |
|----------|--------|---------------------|---------------------|---------------------|--------|---------------------|---------------------|---------------------|
| None     | 134751 | -                   | -                   | -                   | 141108 | -                   | -                   | -                   |
| 1 to 9   | 96537  | 1.92<br>(1.96,1.85) | 1.59<br>(1.61,1.54) | 1.27<br>(1.30,1.25) | 102060 | 1.23<br>(1.27,1.20) | 1.16<br>(1.19,1.14) | 1.11<br>(1.12,1.09) |
| 10 to 19 | 5022   | 1.28<br>(1.41,1.19) | 1.22<br>(1.32,1.14) | 0.98<br>(1.03,0.93) | 5268   | 0.83<br>(0.91,0.77) | 0.90<br>(0.96,0.84) | 0.85<br>(0.90,0.81) |
| 20+      | 3714   | 0.81<br>(0.88,0.75) | 0.84<br>(0.91,0.78) | 0.82<br>(0.88,0.77) | 3843   | 0.53<br>(0.58,0.49) | 0.63<br>(0.67,0.58) | 0.72<br>(0.77,0.68) |

Total number of ED visits age 0-4

|        |        |                     |                     |                     |        |                     |                     |                     |
|--------|--------|---------------------|---------------------|---------------------|--------|---------------------|---------------------|---------------------|
| None   | 205911 | -                   | -                   | -                   | 215601 | -                   | -                   | -                   |
| 1 to 2 | 31854  | 1.20<br>(1.37,1.06) | 0.96<br>(1.06,0.87) | 0.63<br>(0.69,0.58) | 34218  | 0.99<br>(1.02,0.95) | 0.93<br>(0.95,0.90) | 0.69<br>(0.71,0.68) |
| 3+     | 2262   | 0.98<br>(1.01,0.96) | 0.98<br>(1.00,0.96) | 0.99<br>(1.01,0.98) | 2457   | 0.85<br>(0.95,0.75) | 0.76<br>(0.85,0.69) | 0.58<br>(0.63,0.54) |

---

## Appendix 2

### Percentage of children completing each component of B4SC, by year

---

|                 | % of children completing check |         |         |         |
|-----------------|--------------------------------|---------|---------|---------|
| B4 School check | 2011/12                        | 2012/13 | 2013/14 | 2014/15 |
| Vision          | 86.8                           | 88.7    | 90.7    | 91.8    |
| Hearing         | 86.8                           | 88.6    | 90.6    | 91.8    |
| Dental          | 79.4                           | 82.1    | 86.7    | 88.4    |
| Growth          | 79.4                           | 82.1    | 86.7    | 88.4    |
| Immunisation    | 79.1                           | 81.9    | 86.3    | 87.9    |
| PEDS            | 79.4                           | 82.1    | 86.6    | 88.4    |
| SDQP            | 79.3                           | 81.9    | 86.5    | 88.2    |
| SDQT            | 52.9                           | 56.5    | 59.8    | 61.4    |

---
